# Supplementary material for: Docetaxel-loaded Poly(3HB-co-4HB) Biodegradable Nanoparticles: Impact of Co-polymer Composition
Source: Preprints.org preprint supplement (doi:10.20944/preprints202009.0745.v1), 2020-09-30
Supplement: Supplementary file 3 [file supplementary]

**Supplementary Materials**

**
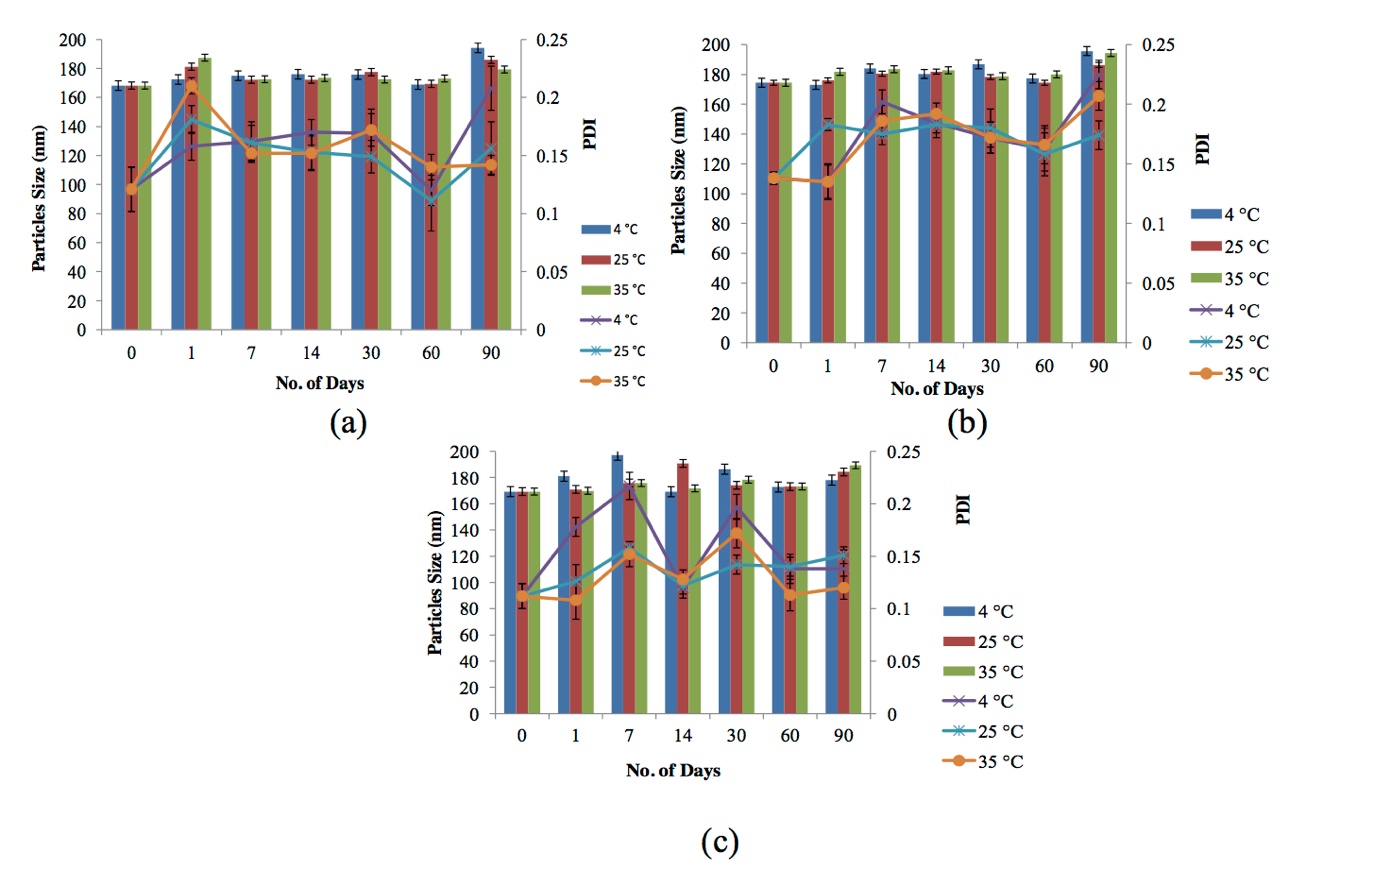
**

Figure S1: Particle size and PDI values of P(3HB-co-4HB) nanoparticles stored at different temperature for 90 days: (a) PHB16; (b) PHB30 and (c) PHB70.
